# Supplementary material
Source: publisher figshare collection journal article supplement (https://acs.figshare.com/ndownloader/files/14221694)
Supplement: Supplementary file 1 [file 14221694]

# **Naphthenic acid mixtures and acid-extractable organics from oil sands process-affected water impair embryonic development of *Silurana (Xenopus) tropicalis***

*Juan M. Gutierrez-Villagomez,<sup>‡</sup> Kerry M. Peru,<sup>‡</sup> Connor Edington,<sup>§</sup> John V. Headley,<sup>§</sup> Bruce D.*

*Pauli,<sup>‡</sup> Vance L. Trudeau <sup>§\*</sup>*

<sup>‡</sup>Department of Biology, University of Ottawa, Ottawa, Ontario, Canada.

<sup>‡</sup>Watershed Hydrology and Ecology Research Division, Water Science and Technology,  
Environment and Climate Change Canada, Saskatoon, Saskatchewan, Canada.

<sup>‡</sup>Ecotoxicology and Wildlife Health Division, Wildlife and Landscape Science Directorate,  
Science and Technology Branch, Environment and Climate Change Canada, Ottawa, Ontario,  
Canada.

## **Supporting information**

Number of pages: 14

Number of figures: 8

Number of tables: 4

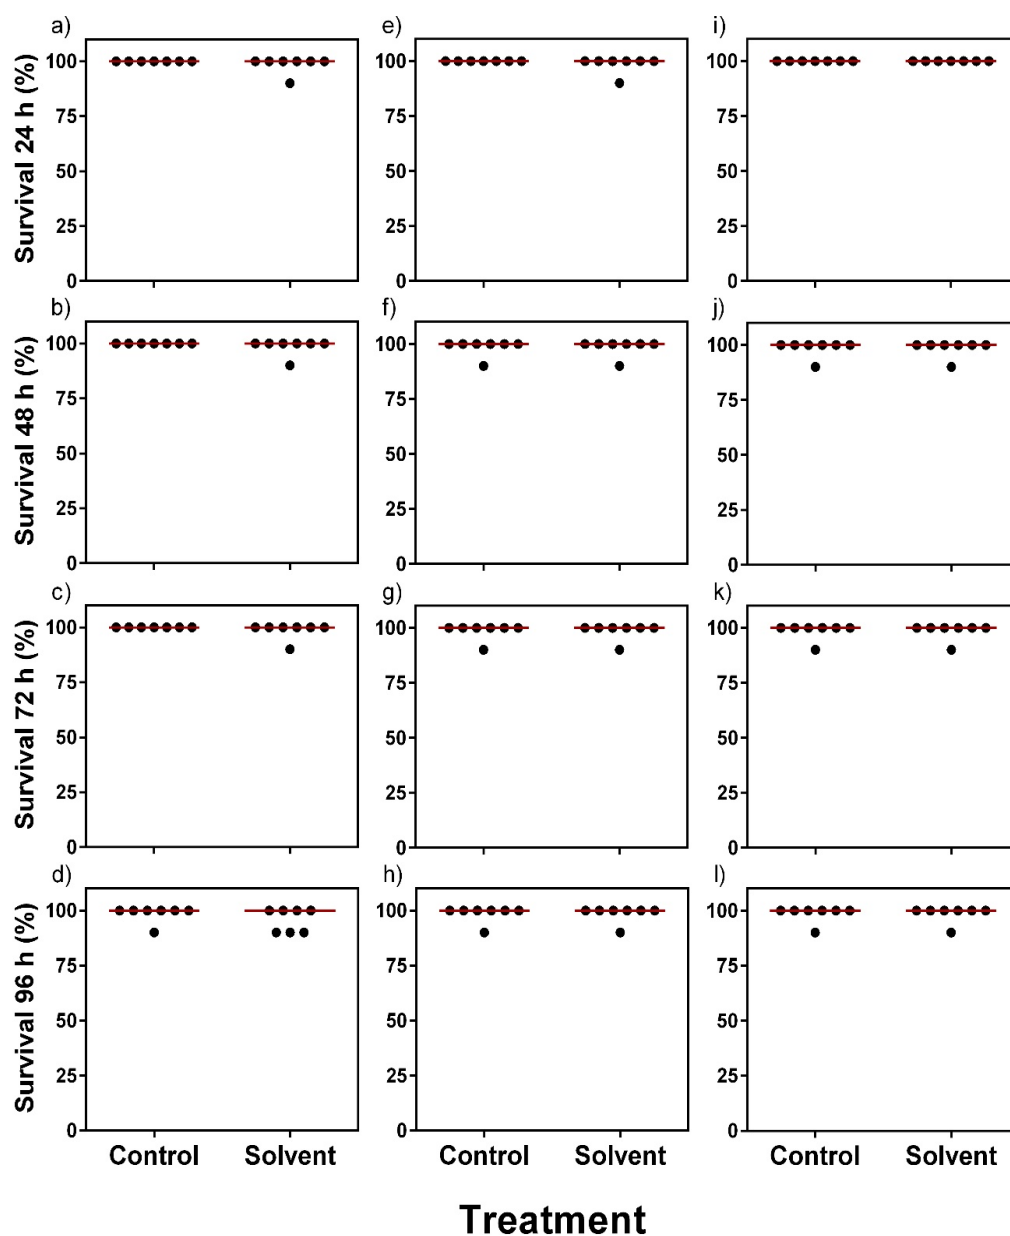

**Figure S1.** Survival rate of control against solvent treatments for 24, 48, 72, and 96 h, for the exposure of *S. tropicalis* embryos to S1M (a-d), S2M (e-h), and an AEOs (i-l). Ethanol at a final concentration of 0.0025% was used as a carrier solvent for S1M and S2M. NaOH at a final

concentration of 0.001 N was used as carrier solvent for AEOs. Each point represents a replicate and the red lines represent the median.

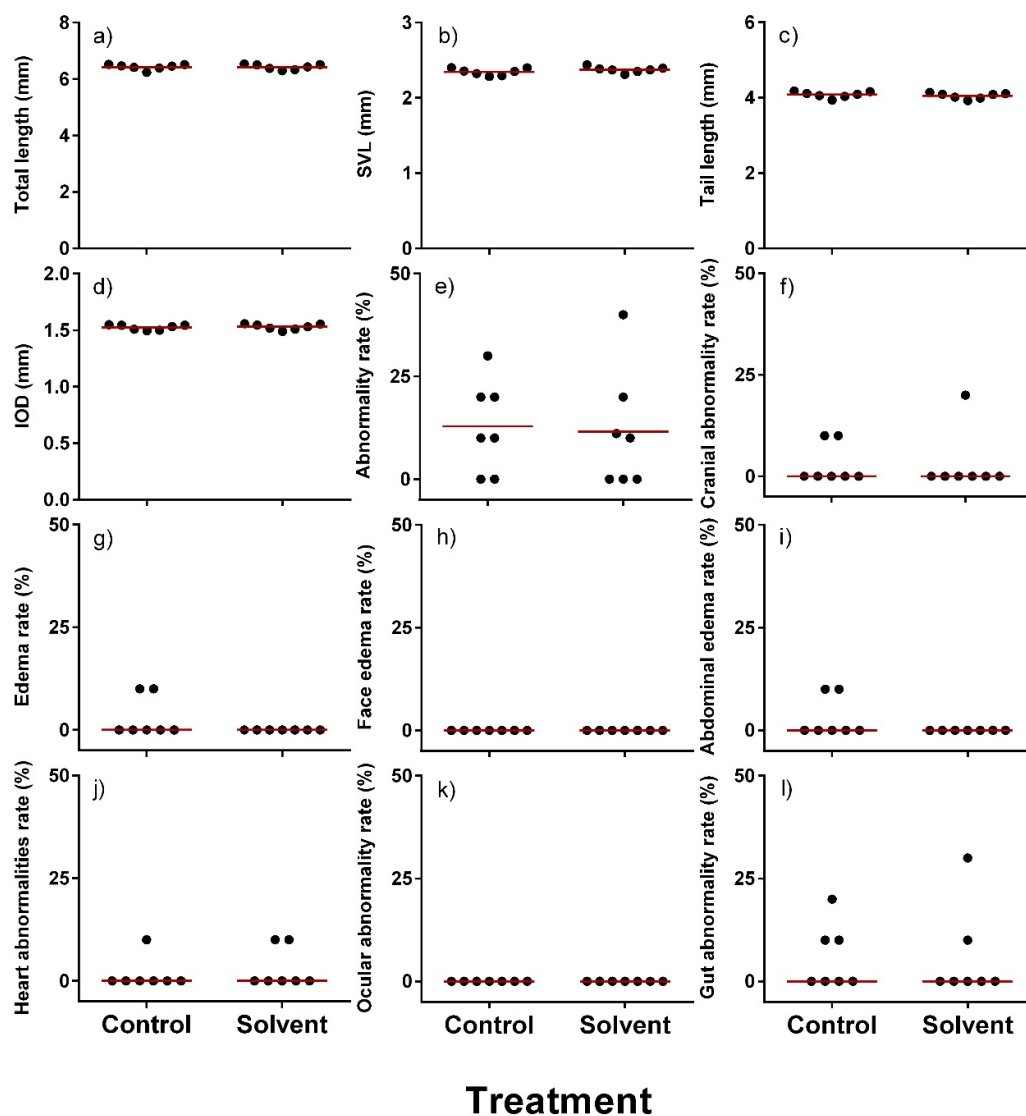

**Figure S2.** Effects of the solvent carrier on teratogenic endpoints in *S. tropicalis* embryos exposed to S1M. The teratogenic endpoints were TL (a), SVL (b), TaL (c), IOD (d), abnormality rate (e), cranial abnormality (f), edema (g), face edema (h), abdominal edema (i), heart abnormality (j),

ocular abnormality (k), and gut abnormality (l). Ethanol at a final concentration of 0.0025% was used as a carrier solvent. Each point represents a replicate. Red line represents the mean in a-e or the median in f-l.

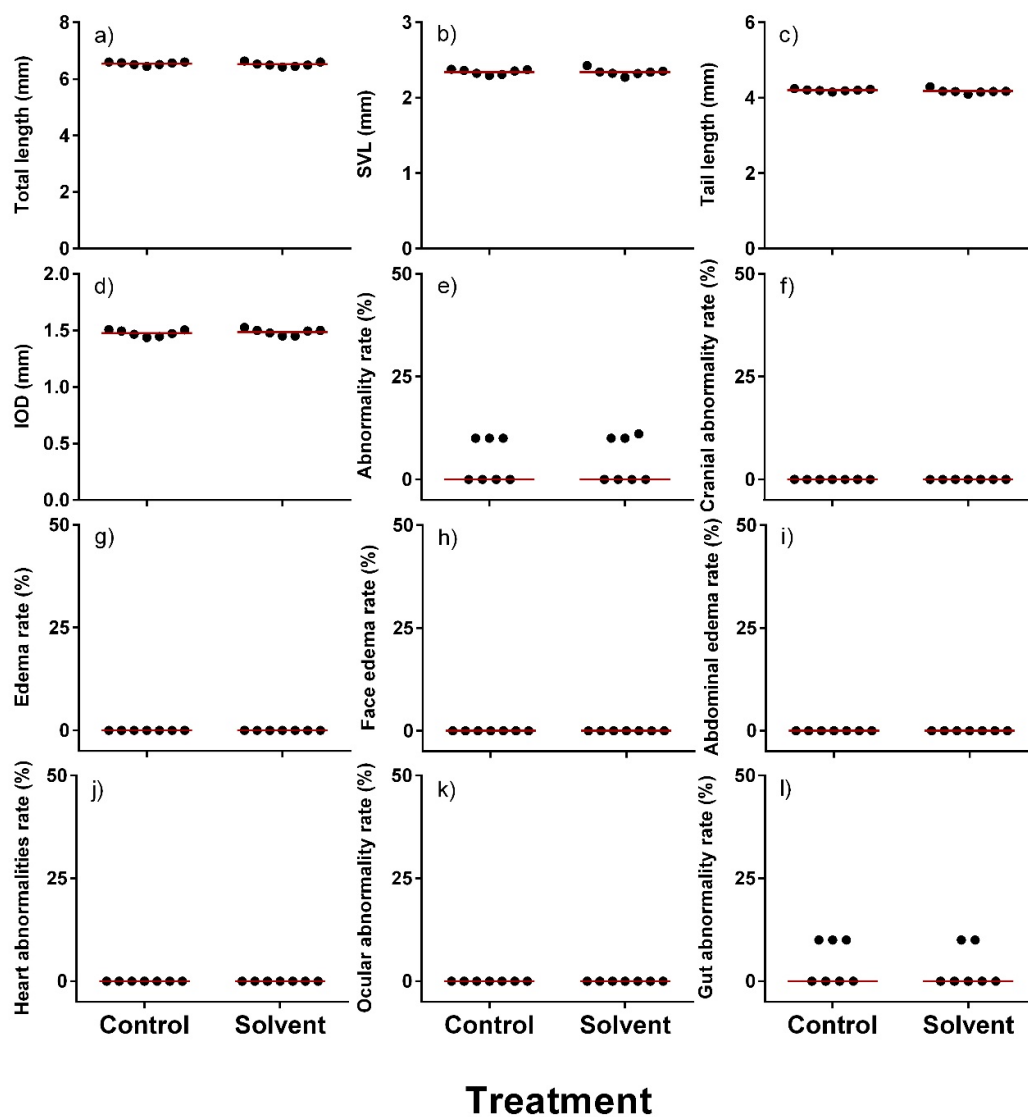

**Figure S3.** Effects of the solvent carrier on teratogenic endpoints in *S. tropicalis* embryos exposed to S2M. The teratogenic endpoints were TL (a), SVL (b), TaL (c), IOD (d), abnormality rate (e),

cranial abnormality (f), edema (g), face edema (h), abdominal edema (i), heart abnormality (j), ocular abnormality (k), and gut abnormality (l). Ethanol at a final concentration of 0.0025% was used as a carrier solvent. Each point represents a replicate. Red line represents the mean in a-d or the median in e-l.

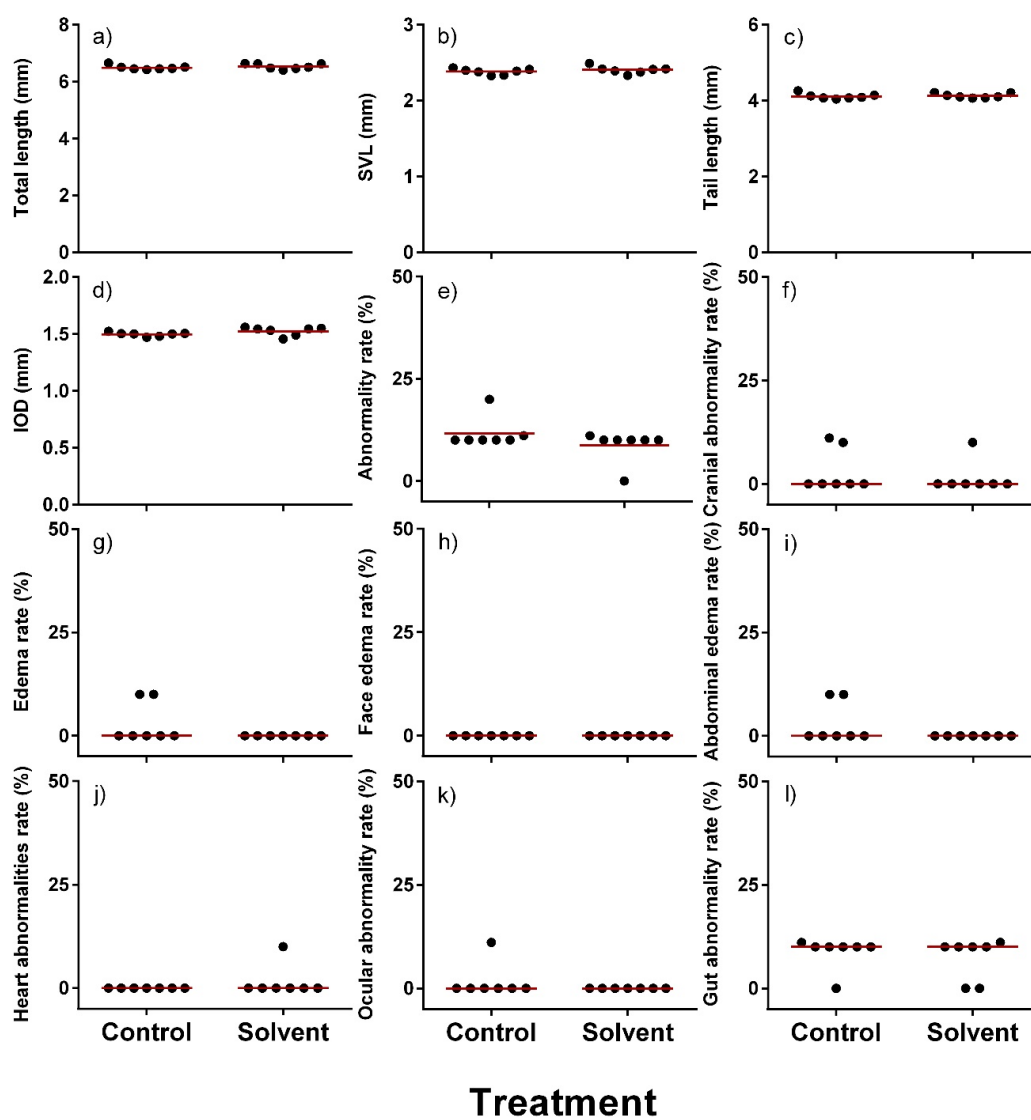

**Figure S4.** Effects of the solvent carrier on teratogenic endpoints in *S. tropicalis* embryos exposed to AEOs. The teratogenic endpoints were TL (a), SVL (b), TaL (c), IOD (d), abnormality rate (e), cranial abnormality (f), edema (g), face edema (h), abdominal edema (i), heart abnormality (j), ocular abnormality (k), and gut abnormality (l). NaOH at a final concentration of 0.001 N was used as carrier solvent. Each point represents a replicate. Red line represents the mean in a-d or the median in e-l.

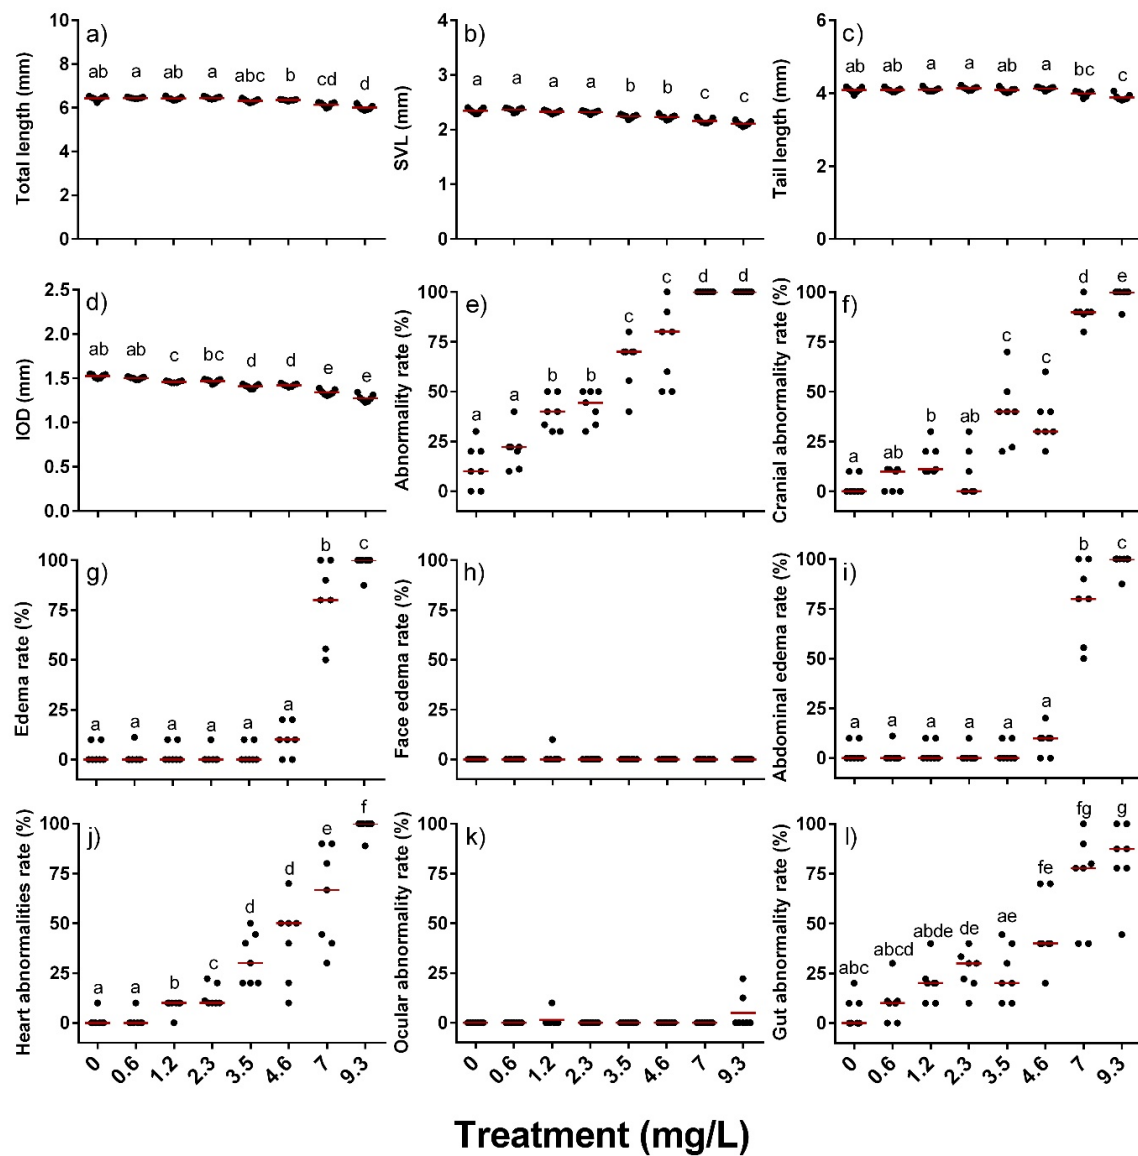

**Figure S5.** Teratogenic effects observed in *S. tropicalis* embryos exposed to S1M. The teratogenic endpoints were TL (a), SVL (b), TaL (c), IOD (d), abnormality rate (e), cranial abnormality rate (f), edema rate (g), face edema rate (h), abdominal edema rate (i), heart abnormality rate (j), ocular abnormality rate (k), and gut abnormality rate (l). Different letters indicate significant difference ( $p < 0.05$ ). Each point represents a replicate. Red line indicates the mean in a-d and l or the median in e-k.

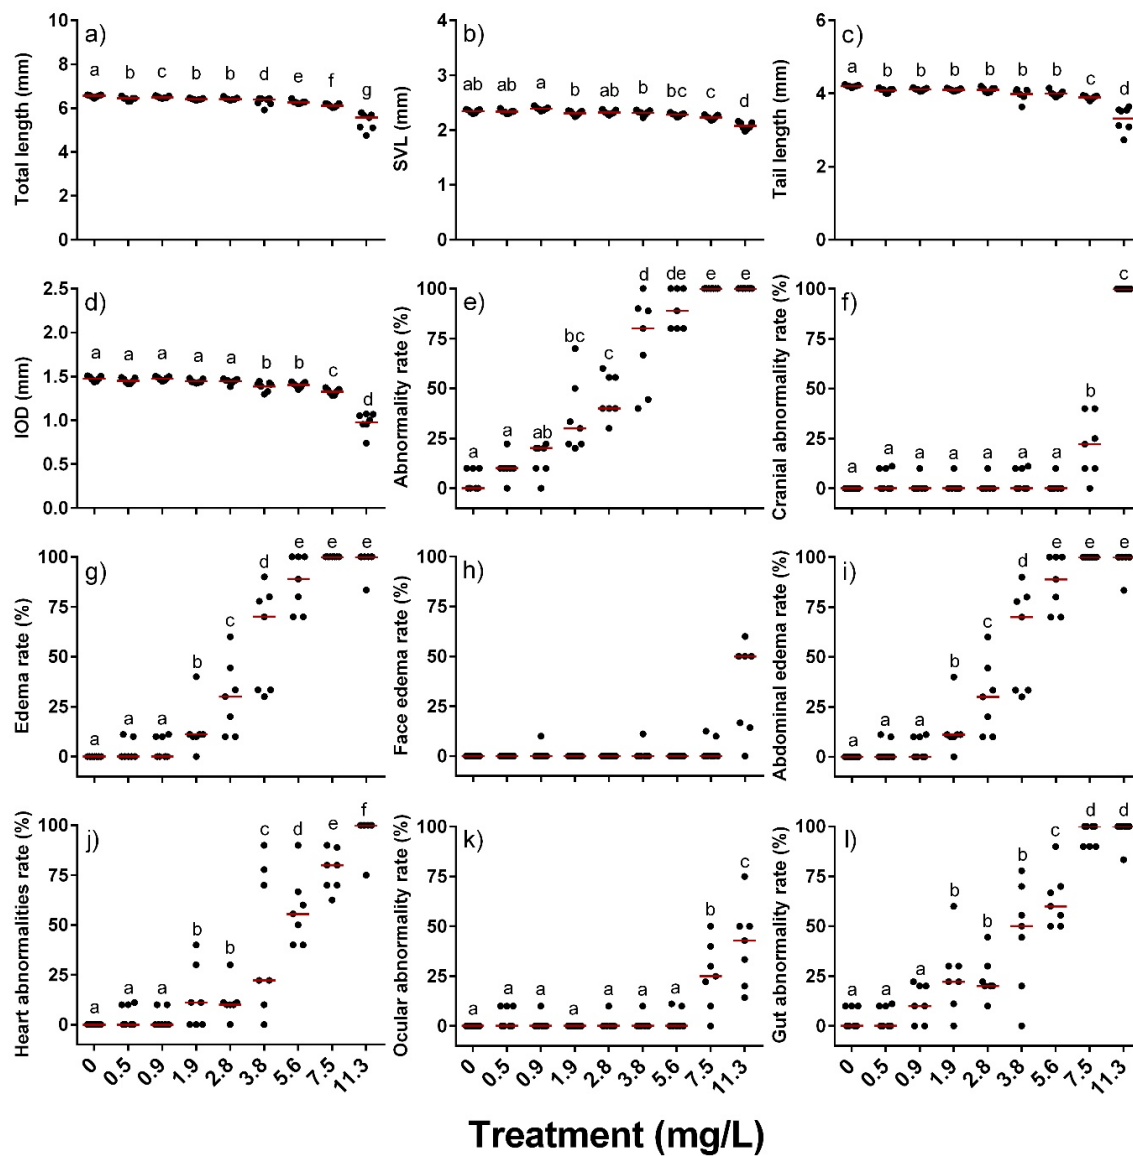

**Figure S6.** Teratogenic effects observed in *S. tropicalis* embryos exposed to S2M. The teratogenic endpoints were TL (a), SVL (b), TaL (c), IOD (d), abnormality rate (e), cranial abnormality rate (f), edema rate (g), face edema rate (h), abdominal edema rate (i), heart abnormality rate (j), ocular abnormality rate (k), and gut abnormality rate (l). Different letters indicate significant difference ( $p < 0.05$ ). Each point represents a replicate. Red line represents the mean in b and e or median in a, c, d, and f-l.



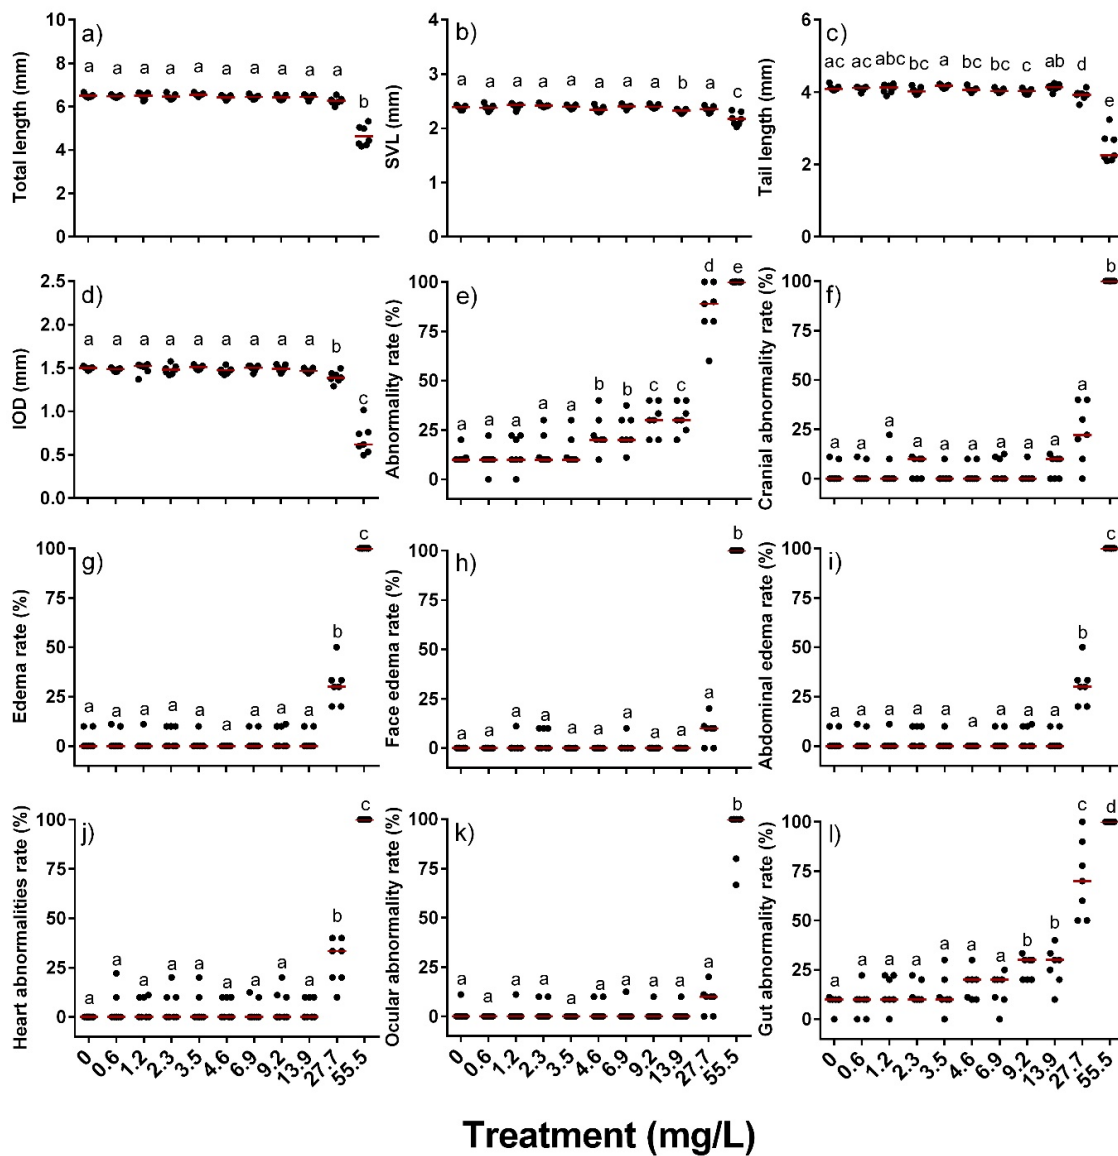

**Figure S7.** Teratogenic effects observed in *S. tropicalis* embryos exposed to AEOs. The teratogenic endpoints were TL (a), SVL (b), TaL (c), IOD (d), abnormality rate (e), cranial abnormality rate (f), edema rate (g), face edema rate (h), abdominal edema rate (i), heart abnormality rate (j), ocular abnormality rate (k), and gut abnormality rate (l). Different letters indicate significant difference ( $p < 0.05$ ). Each point represents a replicate. Red line represents the mean in a or the median in b-l.

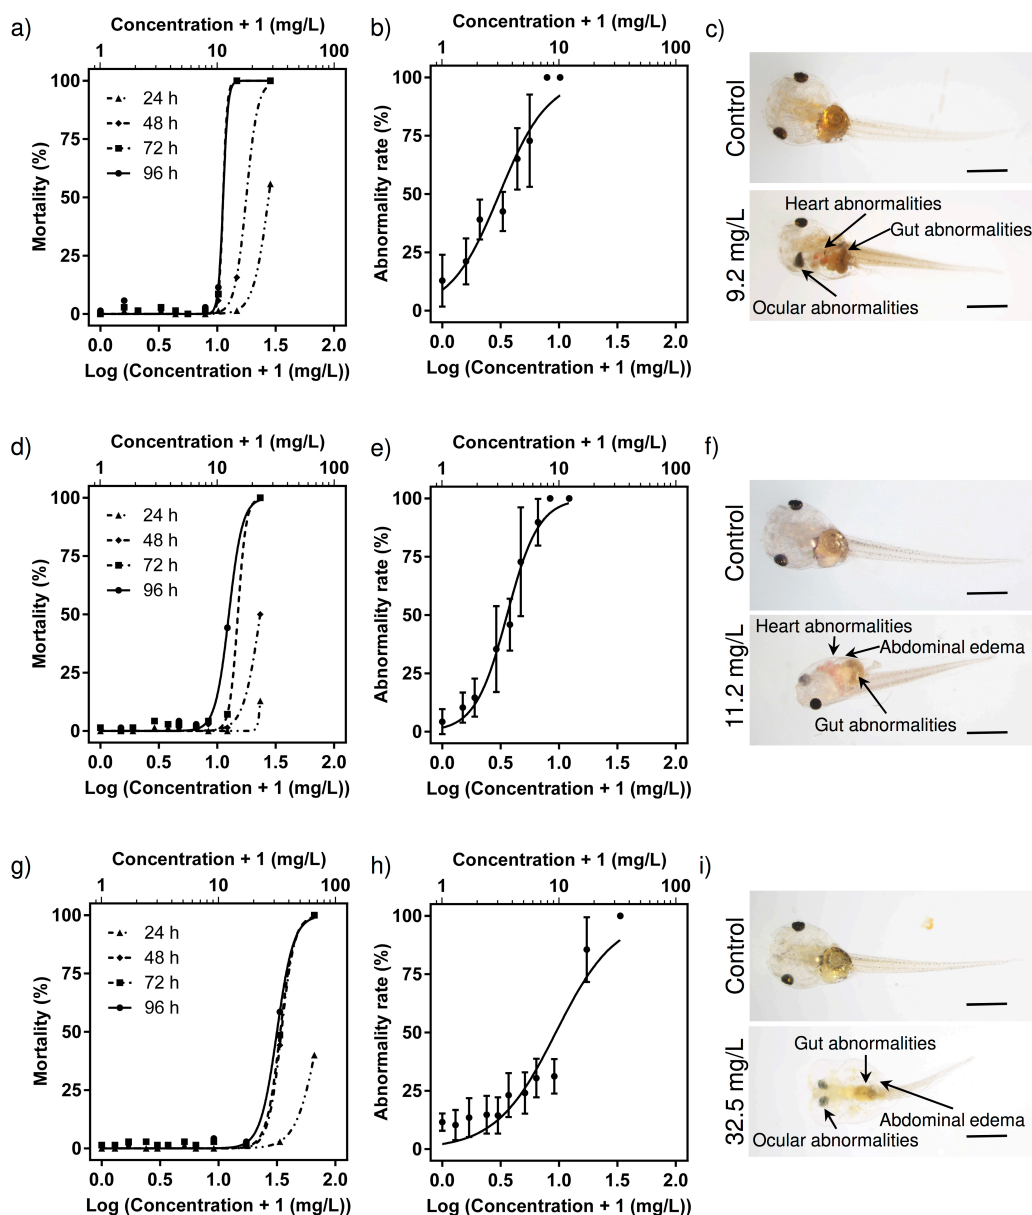

**Figure S8.** Dose-response curves for mortality, abnormality rate and main teratogenic effects induced by exposure of *S. tropicalis* embryos to S1M (a-c), SM2 (d-f), and AEOs (g-i). Concentrations were corrected based on O<sub>2</sub> family proportion. Each point represents the average of seven replicates and bars represent the standard deviation of the mean. The most commonly observed abnormalities were: edema, head malformation, gut malformation, heart abnormalities, and ocular malformation, as indicated by arrows. Scale bar is equal to 1 mm.

**Table S1.** Comparison of the EC<sub>50</sub> and EC<sub>20</sub> based on cranial abnormality rates of the 2 NA extracts (S1M and S2M) and an AEO extract on *S. tropicalis* after a 4-day exposure, based on the nominal concentration, measured concentration, and O<sub>2</sub> family concentration. Confidence interval 95% indicated between brackets. The coefficient of determination (R<sup>2</sup>) calculated in GraphPad is also indicated. Different letters indicate values that are significantly different ( $p < 0.05$ ).

|                         | S1M                    | S2M                    | AEOs                   | S1M                    | S2M                    | AEOs                   |
|-------------------------|------------------------|------------------------|------------------------|------------------------|------------------------|------------------------|
|                         | EC <sub>50</sub>       | EC <sub>50</sub>       | EC <sub>50</sub>       | EC <sub>20</sub>       | EC <sub>20</sub>       | EC <sub>20</sub>       |
| Nominal                 | 3.9 <sup>a</sup>       | 8.7 <sup>b</sup>       | 27.5 <sup>c</sup>      | 2.5 <sup>a</sup>       | 8.0 <sup>b</sup>       | 23.5 <sup>c</sup>      |
| concentration           | [3.6, 4.3]             | [8.3, 10.0]            | [25.4, 35.3]           | [2.2, 2.9]             | [7.5, 9.5]             | [20.6, 31.6]           |
| (mg/L)                  | R <sup>2</sup> = 0.872 | R <sup>2</sup> = 0.960 | R <sup>2</sup> = 0.935 | R <sup>2</sup> = 0.872 | R <sup>2</sup> = 0.960 | R <sup>2</sup> = 0.935 |
| Measured                | 4.5 <sup>a</sup>       | 8.1 <sup>b</sup>       | 31.7 <sup>c</sup>      | 2.9 <sup>a</sup>       | 7.5 <sup>b</sup>       | 27.1 <sup>c</sup>      |
| concentration           | [4.2, 4.9]             | [7.8, 9.4]             | [29.3, 40.7]           | [2.5, 3.3]             | [7.0, 8.9]             | [23.8, 36.4]           |
| (mg/L)                  | R <sup>2</sup> = 0.875 | R <sup>2</sup> = 0.960 | R <sup>2</sup> = 0.935 | R <sup>2</sup> = 0.875 | R <sup>2</sup> = 0.960 | R <sup>2</sup> = 0.935 |
| Concentration           | 4.5 <sup>a</sup>       | 8.1 <sup>b</sup>       | 18.6 <sup>c</sup>      | 2.9 <sup>a</sup>       | 7.0 <sup>b</sup>       | 16.0 <sup>c</sup>      |
| based on the            | [4.1, 4.9]             | [7.7, 9.3]             | [17.3, 24.0]           | [2.5, 3.3]             | [7.4, 8.7]             | [14, 21.4]             |
| O <sub>2</sub> families | R <sup>2</sup> = 0.869 | R <sup>2</sup> = 0.960 | R <sup>2</sup> = 0.935 | R <sup>2</sup> = 0.869 | R <sup>2</sup> = 0.960 | R <sup>2</sup> = 0.935 |
| (mg/L)                  |                        |                        |                        |                        |                        |                        |

**Table S2.** Comparison of the EC<sub>50</sub> and EC<sub>20</sub> based on edema rates of the 2 NA extracts (S1M and S2M) and an AEO extract on *S. tropicalis* after a 4-day exposure, based on the nominal concentration, measured concentration, and O<sub>2</sub> family concentration. Confidence interval 95% indicated between brackets. The coefficient of determination (R<sup>2</sup>) calculated in GraphPad is also indicated. Different letters indicate values that are significantly different ( $p < 0.05$ ).

|                         | S1M                    | S2M                    | AEOs                   | S1M                    | S2M                    | AEOs                   |
|-------------------------|------------------------|------------------------|------------------------|------------------------|------------------------|------------------------|
|                         | EC <sub>50</sub>       | EC <sub>50</sub>       | EC <sub>50</sub>       | EC <sub>20</sub>       | EC <sub>20</sub>       | EC <sub>20</sub>       |
| Nominal                 | 5.2 <sup>b</sup>       | 3.7 <sup>a</sup>       | 26.5 <sup>c</sup>      | 4.4 <sup>b</sup>       | 2.5 <sup>a</sup>       | 22.3 <sup>c</sup>      |
| concentration           | [4.9, 5.3]             | [3.4, 3.9]             | [25.1, 32.2]           | [4.1, 4.7]             | [2.2, 2.8]             | [19.6, 23.3]           |
| (mg/L)                  | R <sup>2</sup> = 0.954 | R <sup>2</sup> = 0.918 | R <sup>2</sup> = 0.964 | R <sup>2</sup> = 0.954 | R <sup>2</sup> = 0.918 | R <sup>2</sup> = 0.964 |
| Measured                | 6.0 <sup>b</sup>       | 3.5 <sup>a</sup>       | 30.5 <sup>c</sup>      | 5.1 <sup>b</sup>       | 2.3 <sup>a</sup>       | 25.8 <sup>c</sup>      |
| concentration           | [5.7, 6.2]             | [3.2, 3.7]             | [29.0, 37.2]           | [4.8, 4.4]             | [2.1, 2.6]             | [22.6, 26.9]           |
| (mg/L)                  | R <sup>2</sup> = 0.954 | R <sup>2</sup> = 0.918 | R <sup>2</sup> = 0.964 | R <sup>2</sup> = 0.954 | R <sup>2</sup> = 0.918 | R <sup>2</sup> = 0.964 |
| Concentration           | 5.9 <sup>b</sup>       | 3.4 <sup>a</sup>       | 18.0 <sup>c</sup>      | 5.0 <sup>b</sup>       | 2.3 <sup>a</sup>       | 15.2 <sup>c</sup>      |
| based on the            | [5.7, 6.2]             | [3.2, 3.6]             | [17.1, 21.9]           | [4.7, 5.3]             | [2.1, 2.6]             | [13.3, 15.8]           |
| O <sub>2</sub> families | R <sup>2</sup> = 0.954 | R <sup>2</sup> = 0.918 | R <sup>2</sup> = 0.964 | R <sup>2</sup> = 0.954 | R <sup>2</sup> = 0.918 | R <sup>2</sup> = 0.964 |
| (mg/L)                  |                        |                        |                        |                        |                        |                        |

**Table S3.** Comparison of the EC<sub>50</sub> and EC<sub>20</sub> based heart abnormality rates of the 2 NA extracts (S1M and S2M) and an AEO extract on *S. tropicalis* after a 4-day exposure, based on the nominal concentration, measured concentration, and O<sub>2</sub> family concentration. Confidence interval 95% indicated between brackets. The coefficient of determination (R<sup>2</sup>) calculated in GraphPad is also indicated. Different letters indicate values that are significantly different ( $p < 0.05$ ).

|                         | S1M                    | S2M                    | AEOs                   | S1M                    | S2M                    | AEOs                   |
|-------------------------|------------------------|------------------------|------------------------|------------------------|------------------------|------------------------|
|                         | EC <sub>50</sub>       | EC <sub>50</sub>       | EC <sub>50</sub>       | EC <sub>20</sub>       | EC <sub>20</sub>       | EC <sub>20</sub>       |
| Nominal                 | 4.3 <sup>a</sup>       | 5.1 <sup>a</sup>       | 26.9 <sup>b</sup>      | 2.5 <sup>a</sup>       | 3.0 <sup>a</sup>       | 22.7 <sup>b</sup>      |
| concentration           | [3.9, 4.7]             | [4.6, 5.7]             | [25.2, 34.2]           | [2.1, 2.9]             | [2.5, 3.5]             | [19.5, 23.7]           |
| (mg/L)                  | R <sup>2</sup> = 0.850 | R <sup>2</sup> = 0.830 | R <sup>2</sup> = 0.931 | R <sup>2</sup> = 0.850 | R <sup>2</sup> = 0.830 | R <sup>2</sup> = 0.931 |
| Measured                | 5.0 <sup>a</sup>       | 4.8 <sup>a</sup>       | 31.1 <sup>b</sup>      | 2.9 <sup>a</sup>       | 2.8 <sup>a</sup>       | 26.2 <sup>b</sup>      |
| concentration           | [4.5, 5.5]             | [4.3, 5.3]             | [29.1, 39.4]           | [2.4, 3.4]             | [2.3, 3.3]             | [22.6, 27.3]           |
| (mg/L)                  | R <sup>2</sup> = 0.850 | R <sup>2</sup> = 0.831 | R <sup>2</sup> = 0.931 | R <sup>2</sup> = 0.850 | R <sup>2</sup> = 0.831 | R <sup>2</sup> = 0.931 |
| Concentration           | 4.9 <sup>a</sup>       | 4.7 <sup>a</sup>       | 18.3 <sup>b</sup>      | 2.9 <sup>a</sup>       | 2.8 <sup>a</sup>       | 15.4 <sup>b</sup>      |
| based on the            | [4.5, 5.4]             | [4.3, 5.3]             | [17.1, 23.2]           | [2.4, 3.3]             | [2.3, 3.3]             | [13.3, 16.1]           |
| O <sub>2</sub> families | R <sup>2</sup> = 0.848 | R <sup>2</sup> = 0.829 | R <sup>2</sup> = 0.931 | R <sup>2</sup> = 0.848 | R <sup>2</sup> = 0.829 | R <sup>2</sup> = 0.931 |
| (mg/L)                  |                        |                        |                        |                        |                        |                        |

**Table S4.** Comparison of the EC<sub>50</sub> and EC<sub>20</sub> based on gut abnormality rates of the 2 NA extracts (S1M and S2M) and an AEO extract on *S. tropicalis* after a 4-day exposure, based on the nominal concentration, measured concentration, and O<sub>2</sub> family concentration. Confidence interval 95% indicated between brackets. The coefficient of determination (R<sup>2</sup>) calculated in GraphPad is also indicated. Different letters indicate values that are significantly different ( $p < 0.05$ ).

|                         | S1M                    | S2M                    | AEOs                   | S1M                    | S2M                    | AEOs                   |
|-------------------------|------------------------|------------------------|------------------------|------------------------|------------------------|------------------------|
|                         | EC <sub>50</sub>       | EC <sub>50</sub>       | EC <sub>50</sub>       | EC <sub>20</sub>       | EC <sub>20</sub>       | EC <sub>20</sub>       |
| Nominal                 | 4.1 <sup>a</sup>       | 4.2 <sup>a</sup>       | 15.2 <sup>b</sup>      | 1.7 <sup>a</sup>       | 2.3 <sup>a</sup>       | 6.4 <sup>b</sup>       |
| concentration           | [3.6, 4.7]             | [3.8, 4.7]             | [13.4, 17.4]           | [1.2, 2.2]             | [1.9, 2.7]             | [5.3, 7.6]             |
| (mg/L)                  | R <sup>2</sup> = 0.740 | R <sup>2</sup> = 0.852 | R <sup>2</sup> = 0.842 | R <sup>2</sup> = 0.740 | R <sup>2</sup> = 0.852 | R <sup>2</sup> = 0.842 |
| Measured                | 4.7 <sup>a</sup>       | 4.0 <sup>a</sup>       | 17.5 <sup>b</sup>      | 2.0 <sup>a</sup>       | 2.1 <sup>a</sup>       | 7.4 <sup>b</sup>       |
| concentration           | [4.1, 5.5]             | [3.6, 4.4]             | [15.5, 20.1]           | [1.4, 2.5]             | [1.7, 2.6]             | [6.2, 8.7]             |
| (mg/L)                  | R <sup>2</sup> = 0.739 | R <sup>2</sup> = 0.853 | R <sup>2</sup> = 0.840 | R <sup>2</sup> = 0.739 | R <sup>2</sup> = 0.853 | R <sup>2</sup> = 0.840 |
| Concentration           | 4.7 <sup>a</sup>       | 3.9 <sup>a</sup>       | 10.3 <sup>b</sup>      | 1.9 <sup>a</sup>       | 2.1 <sup>a</sup>       | 4.3 <sup>b</sup>       |
| based on the            | [4.1, 5.4]             | [3.5, 4.4]             | [9.1, 11.8]            | [1.4, 2.5]             | [1.7, 2.5]             | [3.6, 5.0]             |
| O <sub>2</sub> families | R <sup>2</sup> = 0.739 | R <sup>2</sup> = 0.852 | R <sup>2</sup> = 0.848 | R <sup>2</sup> = 0.739 | R <sup>2</sup> = 0.852 | R <sup>2</sup> = 0.848 |
| (mg/L)                  |                        |                        |                        |                        |                        |                        |
